# Supplementary material for: A Field Efficacy Trial of Recombinant Porcine Circovirus Type 2d Vaccine in Three Herds
Source: MDPI journal article supplement (doi:10.3390/vaccines11091497), 2023-09-16
Supplement: s1 [file s1]

Supplementary data S1. Serum IgG level of piglets.

| Commercial PCV2 ELISA(PCV2a-based) |         |        |       |       |       |       |       |        |       |       |       |       |       |        |       |       |        |       |       |  |
|------------------------------------|---------|--------|-------|-------|-------|-------|-------|--------|-------|-------|-------|-------|-------|--------|-------|-------|--------|-------|-------|--|
|                                    |         | farm H |       |       |       |       |       | farm M |       |       |       |       |       | farm Y |       |       |        |       |       |  |
| groups                             | number  | 3      | 7     | 11    | 15    | 19    | 23    | 3      | 7     | 11    | 15    | 19    | 23    | 3      | 7     | 11    | 15     | 19    | 23    |  |
|                                    |         | 0wpv   | 4wpv  | 8wpv  | 12wpv | 16wpv | 20wpv | 0wpv   | 4wpv  | 8wpv  | 12wpv | 16wpv | 20wpv | 0wpv   | 4wpv  | 8wpv  | 12wpv  | 16wpv | 20wpv |  |
| vaccine                            | 1       | 0.293  | 0.554 | 0.562 | 0.502 | 0.447 | 1.092 | 1.997  | 1.431 | 0.558 | 0.650 | 2.147 | 1.946 | 0.587  | 0.208 | 0.217 | 0.315  | 0.392 | 1.534 |  |
|                                    | 2       | 0.609  | 1.129 | 0.977 | 0.937 | 0.795 | 1.190 | 1.889  | 1.281 | 0.366 | 0.364 | 1.419 | 1.648 | 1.012  | 0.360 | 0.190 | 0.553  | 0.517 | 1.026 |  |
|                                    | 3       | 0.440  | 0.138 | 0.140 | 0.256 | 0.156 | 0.245 | 1.977  | 1.565 | 0.681 | 0.572 | 1.525 | 1.691 | 0.452  | 0.116 | 0.111 | 0.389  | 0.400 | 1.201 |  |
|                                    | 4       | 0.303  | 0.168 | 0.560 | 0.609 | 1.429 | 1.466 | 1.285  | 0.449 | 0.164 | 0.416 | 1.613 | 1.722 | 0.461  | 0.143 | 0.106 | 0.078  | 0.276 | 1.058 |  |
|                                    | 5       | 0.486  | 0.225 | 0.322 | 0.284 | 0.785 | 0.902 | 0.384  | 0.440 | 0.461 | 0.530 | 1.420 | 1.555 | 0.909  | 0.288 | 0.148 | 0.382  | 0.829 | 1.224 |  |
|                                    | 6       | 0.492  | 0.171 | 0.384 | 0.585 | 1.101 | 0.999 | 0.267  | 1.219 | 0.485 | 0.530 | 1.484 | 1.604 | 0.949  | 0.498 | 0.529 | 0.469  | 1.621 | 1.644 |  |
|                                    | 7       | 0.525  | 0.179 | 0.385 | 0.424 | 0.200 | 0.463 | 1.869  | 1.380 | 0.610 | 0.480 | 1.584 | 1.713 | 0.806  | 0.243 | 0.265 | 0.271  | 1.028 | 1.157 |  |
|                                    | 8       | 0.309  | 0.360 | 0.482 | 0.313 | 0.345 | 0.771 | 1.662  | 1.033 | 0.644 | 0.632 | 1.628 | 1.732 | 0.424  | 0.242 | 0.293 | 0.312  | 0.591 | 1.181 |  |
|                                    | 9       | 0.251  | 0.187 | 0.481 | 0.883 | 1.459 | 1.556 | 1.742  | 1.280 | 0.498 | 0.474 | 1.631 | 1.558 | 0.539  | 0.213 | 0.216 | 0.192  | 0.311 | 1.562 |  |
|                                    | 10      | 0.171  | 0.426 | 0.745 | 0.768 | 1.325 | 1.564 | 1.433  | 0.851 | 0.663 | 1.270 | 1.715 | 1.475 | 0.884  | 0.366 | 0.281 | 0.222  | 0.364 | 1.542 |  |
|                                    | 11      | 0.124  | 0.483 | 0.178 | 0.680 | 1.382 | 1.328 | 1.513  | 0.687 | 0.355 | 1.181 | 1.620 | 1.773 | 0.520  | 0.832 | 0.479 | 0.389  | 0.477 | 0.396 |  |
|                                    | 12      | 0.353  | 0.238 | 0.406 | 0.288 | 0.824 | 1.197 | 1.554  | 0.742 | 0.487 | 0.917 | 1.724 | 1.581 | 0.382  | 0.148 | 0.203 | 0.367  | 0.437 | 0.881 |  |
|                                    | 13      | 0.354  | 1.019 | 0.796 | 0.846 | 0.709 | 0.681 | 1.591  | 0.793 | 0.252 | 1.182 | 1.649 | 1.415 | 0.655  | 0.236 | 0.198 | 0.302  | 0.378 | 0.272 |  |
|                                    | 14      | 0.353  | 0.203 | 0.637 | 0.623 | 1.638 | 1.491 | 1.530  | 0.983 | 0.602 | 0.834 | 1.786 | 1.558 | 0.900  | 0.310 | 0.169 | 0.124  | 1.484 | 1.663 |  |
|                                    | 15      | 0.383  | 0.180 | 0.301 | 0.238 | 1.312 | 1.303 | 0.918  | 0.432 | 0.275 | 0.398 | 0.678 | 1.636 | 0.627  | 0.186 | 0.235 | 0.302  | 1.072 | 1.456 |  |
| control                            | 16      | 0.056  | 0.013 | 0.469 | 0.963 | 1.668 | 1.731 | 1.646  | 0.771 | 0.126 | 1.327 | 1.702 | 1.874 | 0.719  | 0.150 | 0.026 | 0.010  | 0.582 | 1.541 |  |
|                                    | 17      | 0.458  | 0.103 | 0.313 | 0.762 | 1.644 | 1.732 | 2.097  | 2.224 | 1.244 | 1.386 | 1.655 | 1.695 | 0.532  | 0.150 | 0.034 | 0.010  | 1.168 | 1.663 |  |
|                                    | 18      | 0.043  | 0.013 | 0.141 | 0.745 | 1.734 | 1.677 | 0.702  | 0.220 | 0.041 | 0.036 | 1.847 | 1.765 | 0.459  | 0.128 | 0.033 | 0.447  | 1.491 | 1.634 |  |
|                                    | 19      | 0.055  | 0.014 | 0.416 | 0.822 | 1.573 | 1.545 | 1.798  | 1.369 | 0.309 | 0.147 | 1.558 | 1.743 | 1.463  | 0.691 | 0.133 | 0.034  | 0.643 | 1.330 |  |
|                                    | 20      | 0.067  | 0.019 | 0.323 | 0.712 | 1.665 | 1.743 | 2.099  | 2.232 | 1.236 | 0.916 | 1.581 | 1.701 | 1.418  | 0.592 | 0.129 | 0.025  | 1.490 | 1.650 |  |
| vaccine                            | ave     | 0.363  | 0.377 | 0.490 | 0.549 | 0.927 | 1.083 | 1.441  | 0.971 | 0.473 | 0.695 | 1.575 | 1.641 | 0.674  | 0.293 | 0.243 | 0.311  | 0.678 | 1.187 |  |
|                                    | geomean | 0.337  | 0.297 | 0.436 | 0.496 | 0.759 | 0.982 | 1.279  | 0.893 | 0.442 | 0.640 | 1.538 | 1.636 | 0.641  | 0.257 | 0.220 | 0.282  | 0.577 | 1.077 |  |
| control                            | ave     | 0.136  | 0.032 | 0.332 | 0.801 | 1.657 | 1.685 | 1.668  | 1.363 | 0.591 | 0.762 | 1.669 | 1.756 | 0.918  | 0.342 | 0.071 | 0.105  | 1.075 | 1.564 |  |
|                                    | geomean | 0.083  | 0.021 | 0.308 | 0.796 | 1.656 | 1.684 | 1.557  | 1.029 | 0.300 | 0.388 | 1.666 | 1.754 | 0.817  | 0.260 | 0.055 | 0.033  | 0.994 | 1.558 |  |
| in-house ELISA(PCV2d-based)        |         |        |       |       |       |       |       |        |       |       |       |       |       |        |       |       |        |       |       |  |
|                                    |         | farm H |       |       |       |       |       | farm M |       |       |       |       |       | farm Y |       |       |        |       |       |  |
| groups                             | number  | 3      | 7     | 11    | 15    | 19    | 23    | 3      | 7     | 11    | 15    | 19    | 23    | 3      | 7     | 11    | 15     | 19    | 23    |  |
|                                    |         | 0wpv   | 4wpv  | 8wpv  | 12wpv | 16wpv | 20wpv | 0wpv   | 4wpv  | 8wpv  | 12wpv | 16wpv | 20wpv | 0wpv   | 4wpv  | 8wpv  | 12wpv  | 16wpv | 20wpv |  |
| vaccine                            | 1       | 0.175  | 1.186 | 2.355 | 1.181 | 0.771 | 1.950 | 1.651  | 0.626 | 1.638 | 1.102 | 3.368 | 3.039 | 0.787  | 1.076 | 1.953 | 1.318  | 1.224 | 3.151 |  |
|                                    | 2       | 0.304  | 2.098 | 3.037 | 1.878 | 1.374 | 2.139 | 1.351  | 1.267 | 2.671 | 1.362 | 2.271 | 2.870 | 0.704  | 0.801 | 1.763 | 1.801  | 1.505 | 2.013 |  |
|                                    | 3       | 0.232  | 0.954 | 2.369 | 1.581 | 0.996 | 1.165 | 2.678  | 1.752 | 2.528 | 1.568 | 2.489 | 3.114 | 0.584  | 0.585 | 1.195 | 1.257  | 1.062 | 2.282 |  |
|                                    | 4       | 0.155  | 1.582 | 2.687 | 1.586 | 2.665 | 2.517 | 0.435  | 1.486 | 2.688 | 1.634 | 2.473 | 3.106 | 0.532  | 0.581 | 1.117 | 0.451  | 1.027 | 2.169 |  |
|                                    | 5       | 0.252  | 1.024 | 2.249 | 1.023 | 2.031 | 1.793 | 0.244  | 2.302 | 2.902 | 1.749 | 2.199 | 2.773 | 0.623  | 2.238 | 2.456 | 1.475  | 2.433 | 3.018 |  |
|                                    | 6       | 0.256  | 1.650 | 2.331 | 1.465 | 2.178 | 1.740 | 0.110  | 1.447 | 2.508 | 1.209 | 2.060 | 2.595 | 0.654  | 0.803 | 1.931 | 0.954  | 3.138 | 3.329 |  |
|                                    | 7       | 0.270  | 1.543 | 2.396 | 1.218 | 0.670 | 0.882 | 1.479  | 0.743 | 1.420 | 0.791 | 2.303 | 2.766 | 0.543  | 0.508 | 1.784 | 1.252  | 1.736 | 1.776 |  |
|                                    | 8       | 0.150  | 1.380 | 2.458 | 0.946 | 0.899 | 1.905 | 2.054  | 0.968 | 1.961 | 1.116 | 2.444 | 2.337 | 0.250  | 0.830 | 1.689 | 1.041  | 1.251 | 2.020 |  |
|                                    | 9       | 0.127  | 1.506 | 2.602 | 2.152 | 2.768 | 2.960 | 1.732  | 1.461 | 2.458 | 1.348 | 2.900 | 2.774 | 0.495  | 0.689 | 1.341 | 1.034  | 0.971 | 3.094 |  |
|                                    | 10      | 0.114  | 2.489 | 3.026 | 1.897 | 2.683 | 3.242 | 1.392  | 0.665 | 1.818 | 0.668 | 3.038 | 3.129 | 0.689  | 1.464 | 2.116 | 1.300  | 1.221 | 2.995 |  |
|                                    | 11      | 0.085  | 1.075 | 1.923 | 1.770 | 2.568 | 2.372 | 1.104  | 2.145 | 2.884 | 3.193 | 2.459 | 3.330 | 0.311  | 0.819 | 1.969 | 1.341  | 0.913 | 0.595 |  |
|                                    | 12      | 0.177  | 1.111 | 2.596 | 1.026 | 1.697 | 2.243 | 0.756  | 1.943 | 2.892 | 2.634 | 3.188 | 2.951 | 0.198  | 0.948 | 1.811 | 1.611  | 1.315 | 1.617 |  |
|                                    | 13      | 0.151  | 1.703 | 2.637 | 1.893 | 1.128 | 0.933 | 1.475  | 1.491 | 1.825 | 0.677 | 3.220 | 2.880 | 0.299  | 0.968 | 2.391 | 1.865  | 1.246 | 0.698 |  |
|                                    | 14      | 0.155  | 1.141 | 2.668 | 1.551 | 2.951 | 2.740 | 0.573  | 1.988 | 2.806 | 2.122 | 3.256 | 3.011 | 0.711  | 0.860 | 1.560 | 0.802  | 2.854 | 3.013 |  |
|                                    | 15      | 0.182  | 1.794 | 2.816 | 1.390 | 2.923 | 2.754 | 0.874  | 1.856 | 2.495 | 1.594 | 0.349 | 3.010 | 0.342  | 0.993 | 1.835 | 1.376  | 2.000 | 2.740 |  |
| control                            | 16      | 0.067  | 0.112 | 2.243 | 3.204 | 3.335 | 3.358 | 0.631  | 0.212 | 0.242 | 3.279 | 2.465 | 3.148 | 0.450  | 0.196 | 0.172 | 0.145  | 3.358 | 3.313 |  |
|                                    | 17      | 0.184  | 0.156 | 1.397 | 3.131 | 3.351 | 3.397 | 3.059  | 2.942 | 2.434 | 2.055 | 2.464 | 2.998 | 0.446  | 0.204 | 0.170 | 0.104  | 3.207 | 3.284 |  |
|                                    | 18      | 0.063  | 0.120 | 1.735 | 3.126 | 3.358 | 3.340 | 0.655  | 0.296 | 0.309 | 0.194 | 3.300 | 3.295 | 0.284  | 0.169 | 0.151 | 0.3050 | 3.364 | 3.312 |  |
|                                    | 19      | 0.066  | 0.110 | 1.799 | 3.153 | 3.309 | 3.301 | 1.907  | 0.867 | 0.389 | 0.155 | 2.768 | 3.264 | 1.426  | 0.580 | 0.332 | 0.126  | 3.038 | 3.253 |  |
|                                    | 20      | 0.070  | 0.110 | 1.919 | 3.110 | 3.277 | 3.267 | 3.084  | 2.744 | 2.195 | 0.965 | 2.422 | 2.441 | 1.408  | 0.535 | 0.313 | 0.166  | 3.242 | 3.338 |  |
| vaccine                            | ave     | 0.186  | 1.482 | 2.543 | 1.504 | 1.887 | 2.089 | 1.194  | 1.476 | 2.366 | 1.518 | 2.535 | 2.912 | 0.515  | 0.944 | 1.794 | 1.258  | 1.593 | 2.301 |  |
|                                    | geomean | 0.176  | 1.429 | 2.527 | 1.459 | 1.678 | 1.954 | 0.926  | 1.368 | 2.311 | 1.379 | 2.320 | 2.902 | 0.476  | 0.879 | 1.753 | 1.196  | 1.474 | 2.078 |  |
| control                            | ave     | 0.090  | 0.122 | 1.818 | 3.145 | 3.326 | 3.333 | 1.867  | 1.412 | 1.114 | 1.330 | 2.684 | 3.029 | 0.803  | 0.337 | 0.227 | 0.718  | 3.242 | 3.300 |  |
|                                    | geomean | 0.081  | 0.120 | 1.797 | 3.145 | 3.326 | 3.332 | 1.494  | 0.848 | 0.690 | 0.722 | 2.665 | 3.012 | 0.648  | 0.291 | 0.215 | 0.249  | 3.239 | 3.300 |  |

Supplementary data S2. NA titers.

|        |       | vaccine |      |      |      |      |      |      |     |      |      |      |      |      |      |     | control |      |      |      |      | vaccine |        | control |        |
|--------|-------|---------|------|------|------|------|------|------|-----|------|------|------|------|------|------|-----|---------|------|------|------|------|---------|--------|---------|--------|
|        |       | 1       | 2    | 3    | 4    | 5    | 6    | 7    | 8   | 9    | 10   | 11   | 12   | 13   | 14   | 15  | 16      | 17   | 18   | 19   | 20   | mean    | sd     | mean    | sd     |
| farm H | 0wpv  | 8       | 8    | 8    | 8    | 8    | 8    | 8    | 8   | 8    | 8    | 8    | 8    | 8    | 8    | 8   | 8       | 8    | 8    | 8    | 8    | 8.00    | 0.00   | 8.00    | 0.00   |
|        | 4wpv  | 64      | 128  | 32   | 32   | 64   | 64   | 64   | 64  | 128  | 256  | 64   | 64   | 256  | 128  | 256 | 8       | 8    | 8    | 8    | 8    | 110.93  | 81.01  | 8.00    | 0.00   |
|        | 8wpv  | 128     | 256  | 128  | 64   | 64   | 128  | 128  | 128 | 128  | 512  | 64   | 256  | 64   | 64   | 64  | 8       | 8    | 8    | 8    | 8    | 145.07  | 119.65 | 8.00    | 0.00   |
|        | 12wpv | 64      | 128  | 128  | 128  | 64   | 128  | 64   | 64  | 128  | 128  | 128  | 64   | 256  | 128  | 128 | 2048    | 256  | 512  | 128  | 1024 | 115.20  | 49.57  | 793.60  | 780.70 |
|        | 16wpv | 32      | 128  | 64   | 512  | 256  | 256  | 32   | 64  | 512  | 256  | 256  | 256  | 64   | 512  | 512 | 2048    | 1024 | 512  | 2048 | 2048 | 247.47  | 186.77 | 1536.00 | 724.08 |
|        | 20wpv | 256     | 256  | 32   | 256  | 256  | 16   | 64   | 256 | 1024 | 256  | 256  | 512  | 64   | 256  | 256 | 2048    | 2048 | 2048 | 2048 | 2048 | 267.73  | 244.19 | 2048.00 | 0.00   |
|        |       |         |      |      |      |      |      |      |     |      |      |      |      |      |      |     |         |      |      |      |      |         |        |         |        |
|        |       |         |      |      |      |      |      |      |     |      |      |      |      |      |      |     |         |      |      |      |      |         |        |         |        |
|        |       | vaccine |      |      |      |      |      |      |     |      |      |      |      |      |      |     | control |      |      |      |      | vaccine |        | control |        |
|        |       | 1       | 2    | 3    | 4    | 5    | 6    | 7    | 8   | 9    | 10   | 11   | 12   | 13   | 14   | 15  | 16      | 17   | 18   | 19   | 20   | mean    | sd     | mean    | sd     |
| farm M | 0wpv  | 8       | 8    | 8    | 8    | 8    | 8    | 16   | 32  | 16   | 8    | 8    | 16   | 8    | 8    | 8   | 8       | 8    | 8    | 8    | 16   | 11.20   | 6.62   | 9.60    | 3.58   |
|        | 4wpv  | 64      | 64   | 64   | 64   | 64   | 128  | 16   | 128 | 128  | 64   | 128  | 128  | 128  | 64   | 128 | 16      | 256  | 16   | 64   | 256  | 90.67   | 38.09  | 121.60  | 124.24 |
|        | 8wpv  | 64      | 256  | 64   | 128  | 256  | 32   | 16   | 64  | 128  | 64   | 128  | 128  | 128  | 512  | 256 | 8       | 128  | 8    | 8    | 8    | 148.27  | 127.78 | 32.00   | 53.67  |
|        | 12wpv | 32      | 128  | 128  | 128  | 128  | 64   | 8    | 128 | 128  | 64   | 1024 | 512  | 16   | 128  | 128 | 2048    | 512  | 8    | 8    | 8    | 182.93  | 260.41 | 516.80  | 883.35 |
|        | 16wpv | 1024    | 512  | 2048 | 2048 | 512  | 512  | 256  | 512 | 1024 | 512  | 1024 | 1024 | 1024 | 1024 | 8   | 2048    | 2048 | 2048 | 256  | 2048 | 836.80  | 583.49 | 1689.60 | 801.41 |
|        | 20wpv | 2048    | 1024 | 2048 | 2048 | 1024 | 512  | 1024 | 256 | 256  | 256  | 2048 | 1024 | 512  | 1024 | 256 | 2048    | 512  | 2048 | 2048 | 2048 | 1024.00 | 711.03 | 1740.80 | 686.92 |
|        |       |         |      |      |      |      |      |      |     |      |      |      |      |      |      |     |         |      |      |      |      |         |        |         |        |
|        |       |         |      |      |      |      |      |      |     |      |      |      |      |      |      |     |         |      |      |      |      |         |        |         |        |
|        |       | vaccine |      |      |      |      |      |      |     |      |      |      |      |      |      |     | control |      |      |      |      | vaccine |        | control |        |
|        |       | 1       | 2    | 3    | 4    | 5    | 6    | 7    | 8   | 9    | 10   | 11   | 12   | 13   | 14   | 15  | 16      | 17   | 18   | 19   | 20   | mean    | sd     | mean    | sd     |
| farm Y | 0wpv  | 8       | 8    | 8    | 8    | 8    | 8    | 8    | 8   | 8    | 8    | 8    | 8    | 8    | 8    | 8   | 8       | 8    | 8    | 8    | 8    | 8.00    | 0.00   | 8.00    | 0.00   |
|        | 4wpv  | 16      | 16   | 32   | 16   | 128  | 32   | 32   | 32  | 32   | 128  | 256  | 16   | 64   | 16   | 16  | 8       | 8    | 8    | 32   | 32   | 55.47   | 67.03  | 17.60   | 13.15  |
|        | 8wpv  | 64      | 128  | 64   | 64   | 128  | 64   | 64   | 64  | 64   | 128  | 128  | 128  | 64   | 32   | 32  | 8       | 8    | 8    | 8    | 8    | 81.07   | 36.01  | 8.00    | 0.00   |
|        | 12wpv | 64      | 128  | 128  | 32   | 64   | 64   | 64   | 64  | 64   | 64   | 128  | 128  | 128  | 32   | 64  | 8       | 8    | 1024 | 8    | 8    | 81.07   | 36.01  | 211.20  | 454.37 |
|        | 16wpv | 128     | 128  | 128  | 128  | 128  | 512  | 128  | 128 | 64   | 64   | 128  | 128  | 128  | 512  | 256 | 2048    | 512  | 2048 | 256  | 128  | 179.20  | 141.46 | 998.40  | 968.07 |
|        | 20wpv | 512     | 256  | 256  | 128  | 512  | 2048 | 256  | 256 | 512  | 1024 | 32   | 128  | 64   | 512  | 256 | 2048    | 2048 | 1024 | 2048 | 2048 | 450.13  | 508.34 | 1843.20 | 457.95 |

Supplementary data S3. Viremia (Ct value).

[illegible]

Supplementary data S4. Body weight.

| body weight(unit; Kg) |        |        |       |       |       |        |       |       |       |        |       |       |       |
|-----------------------|--------|--------|-------|-------|-------|--------|-------|-------|-------|--------|-------|-------|-------|
|                       |        | farm H |       |       |       | farm M |       |       |       | farm Y |       |       |       |
|                       |        | 3      | 7     | 11    | 15    | 3      | 7     | 11    | 15    | 3      | 7     | 11    | 15    |
| groups                | number | 0wpv   | 4wpv  | 8wpv  | 12wpv | 0wpv   | 4wpv  | 8wpv  | 12wpv | 0wpv   | 4wpv  | 8wpv  | 12wpv |
| vaccine               | 1      | 8.8    | 15.4  | 28.8  | 41.3  | 8.0    | 14.5  | 32.8  | 56.2  | 7.6    | 19.5  | 33.1  | 48.2  |
|                       | 2      | 8.9    | 22.2  | 36.8  | 43.9  | 8.2    | 14.4  | 30.4  | 45.9  | 7.0    | 15.6  | 26.3  | 48.0  |
|                       | 3      | 6.6    | 17.3  | 35.2  | 56.5  | 7.6    | 19.1  | 30.9  | 49.8  | 7.3    | 19.9  | 27.6  | 52.8  |
|                       | 4      | 7.7    | 22.2  | 26.4  | 57.1  | 6.2    | 17.0  | 29.6  | 42.8  | 7.4    | 19.0  | 31.6  | 42.8  |
|                       | 5      | 7.0    | 16.0  | 30.6  | 39.9  | 6.5    | 15.8  | 29.3  | 45.6  | 7.3    | 17.3  | 26.0  | 44.7  |
|                       | 6      | 7.3    | 20.1  | 37.0  | 54.0  | 7.7    | 18.8  | 26.9  | 46.8  | 8.1    | 18.5  | 31.7  | 48.5  |
|                       | 7      | 6.6    | 17.5  | 29.8  | 47.3  | 7.6    | 15.7  | 35.5  | 45.5  | 7.0    | 19.5  | 29.5  | 41.1  |
|                       | 8      | 7.6    | 15.7  | 27.5  | 47.9  | 6.7    | 13.0  | 32.3  | 57.0  | 6.5    | 18.5  | 28.4  | 41.5  |
|                       | 9      | 6.2    | 16.5  | 25.2  | 42.3  | 6.1    | 16.3  | 31.0  | 47.9  | 7.6    | 16.2  | 31.1  | 43.6  |
|                       | 10     | 6.1    | 15.3  | 31.1  | 46.4  | 7.2    | 12.8  | 35.1  | 49.5  | 6.9    | 18.0  | 32.2  | 52.0  |
| control               | 1      | 7.1    | 18.6  | 27.8  | 44.0  | 7.3    | 13.7  | 26.5  | 44.2  | 6.8    | 15.9  | 27.3  | 35.2  |
|                       | 2      | 6.8    | 19.1  | 24.9  | 43.5  | 6.9    | 14.2  | 28.3  | 47.1  | 7.2    | 16.8  | 26.7  | 40.2  |
|                       | 3      | 6.9    | 13.6  | 28.4  | 47.7  | 6.6    | 13.2  | 27.8  | 45.1  | 6.3    | 16.8  | 25.1  | 42.6  |
|                       | 4      | 6.5    | 17.8  | 26.9  | 45.8  | 8.3    | 12.2  | 26.7  | 46.8  | 7.9    | 17.2  | 25.4  | 42.5  |
|                       | 5      | 7.7    | 17.1  | 24.7  | 41.3  | 6.2    | 15.9  | 31.1  | 42.5  | 7.1    | 14.4  | 27.1  | 45.6  |
|                       | 6      | 5.9    | 16.4  | 31.5  | 45.1  | 6.2    | 15.4  | 26.8  | 47.4  | 7.2    | 13.0  | 21.9  | 40.5  |
|                       | 7      | 7.9    | 17.1  | 30.6  | 42.1  | 6.1    | 14.9  | 28.9  | 43.9  | 7.6    | 18.7  | 25.7  | 47.1  |
|                       | 8      | 7.5    | 17.4  | 30.6  | 44.2  | 6.6    | 13.1  | 29.9  | 48.1  | 6.8    | 15.4  | 28.4  | 45.7  |
|                       | 9      | 7.5    | 15.5  | 31.7  | 46.6  | 6.7    | 14.5  | 29.5  | 43.2  | 7.2    | 16.7  | 31.1  | 42.1  |
|                       | 10     | 7.6    | 16.3  | 31.5  | 43.5  | 7.3    | 14.8  | 27.5  | 43.2  | 8.1    | 17.6  | 33.0  | 42.0  |
|                       |        | 0wpv   | 4wpv  | 8wpv  | 12wpv | 0wpv   | 4wpv  | 8wpv  | 12wpv | 0wpv   | 4wpv  | 8wpv  | 12wpv |
| vaccine               | sum    | 72.5   | 178.2 | 308.4 | 476.6 | 71.6   | 157.4 | 313.8 | 487.0 | 72.5   | 182.0 | 297.5 | 463.2 |
|                       | mean   | 7.2    | 17.8  | 30.8  | 47.7  | 7.2    | 15.7  | 31.4  | 48.7  | 7.2    | 18.2  | 29.8  | 46.3  |
|                       | sd     | 1.0    | 2.7   | 4.2   | 6.3   | 0.8    | 2.2   | 2.6   | 4.6   | 0.4    | 1.4   | 2.6   | 4.2   |
| control               | sum    | 71.4   | 168.9 | 288.6 | 443.8 | 68.0   | 141.9 | 283.0 | 451.5 | 72.2   | 162.5 | 271.7 | 423.5 |
|                       | mean   | 7.1    | 16.9  | 28.9  | 44.4  | 6.8    | 14.2  | 28.3  | 45.2  | 7.2    | 16.3  | 27.2  | 42.4  |
|                       | sd     | 0.6    | 1.6   | 2.7   | 2.0   | 0.6    | 1.6   | 2.7   | 2.0   | 0.5    | 1.6   | 3.1   | 3.4   |
